# Supplementary material
Source: PubMed Central journal article supplement (PMC7725385)
Supplement: NIHMS1590487-supplement-Figure_S1.pdf [file NIHMS1590487-supplement-Figure_S1.pdf]

### Supplemental Materials

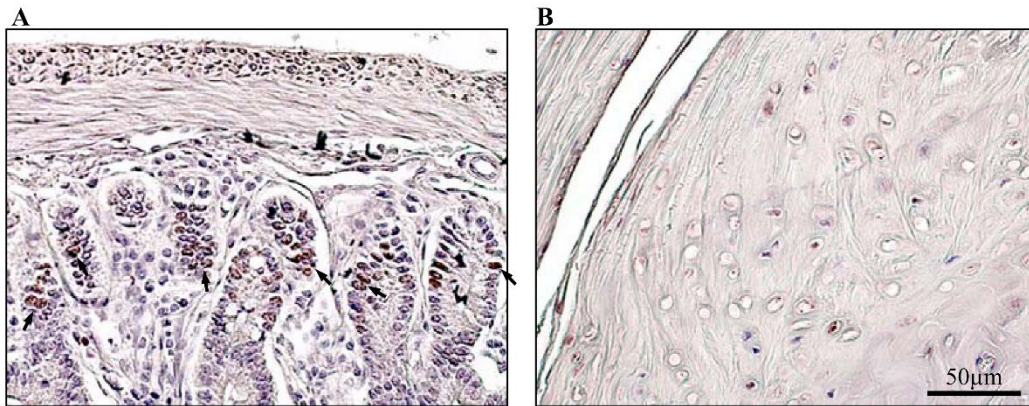

Supplemental Figure 1: Positive (A) and negative (B) control staining for BrdU on a small intestine section from a BrdU-treated mouse and on an Achilles tendon enthesis section from a WT mouse that didn't take BrdU, respectively. Arrows in A indicate BrdU+ cells. Scale bar, 50µm for both images.

Preprint - For Review Only
